# Supplementary material for: Supercritical carbon dioxide extraction of crude tall oil: an alternative upgrading approach
Source: publisher site journal article supplement (doi:10.1515/hf-2024-0126), 2025-06-01
Supplement: Supplementary file 1 [file j_hf-2024-0126_suppl_002.docx]

**Supplementary Material**

**Supercritical carbon dioxide extraction of crude tall oil: an alternative upgrading approach**

Dennis Marvin Janek Möck et al.

DOI 10.1515/hf-2024-0126


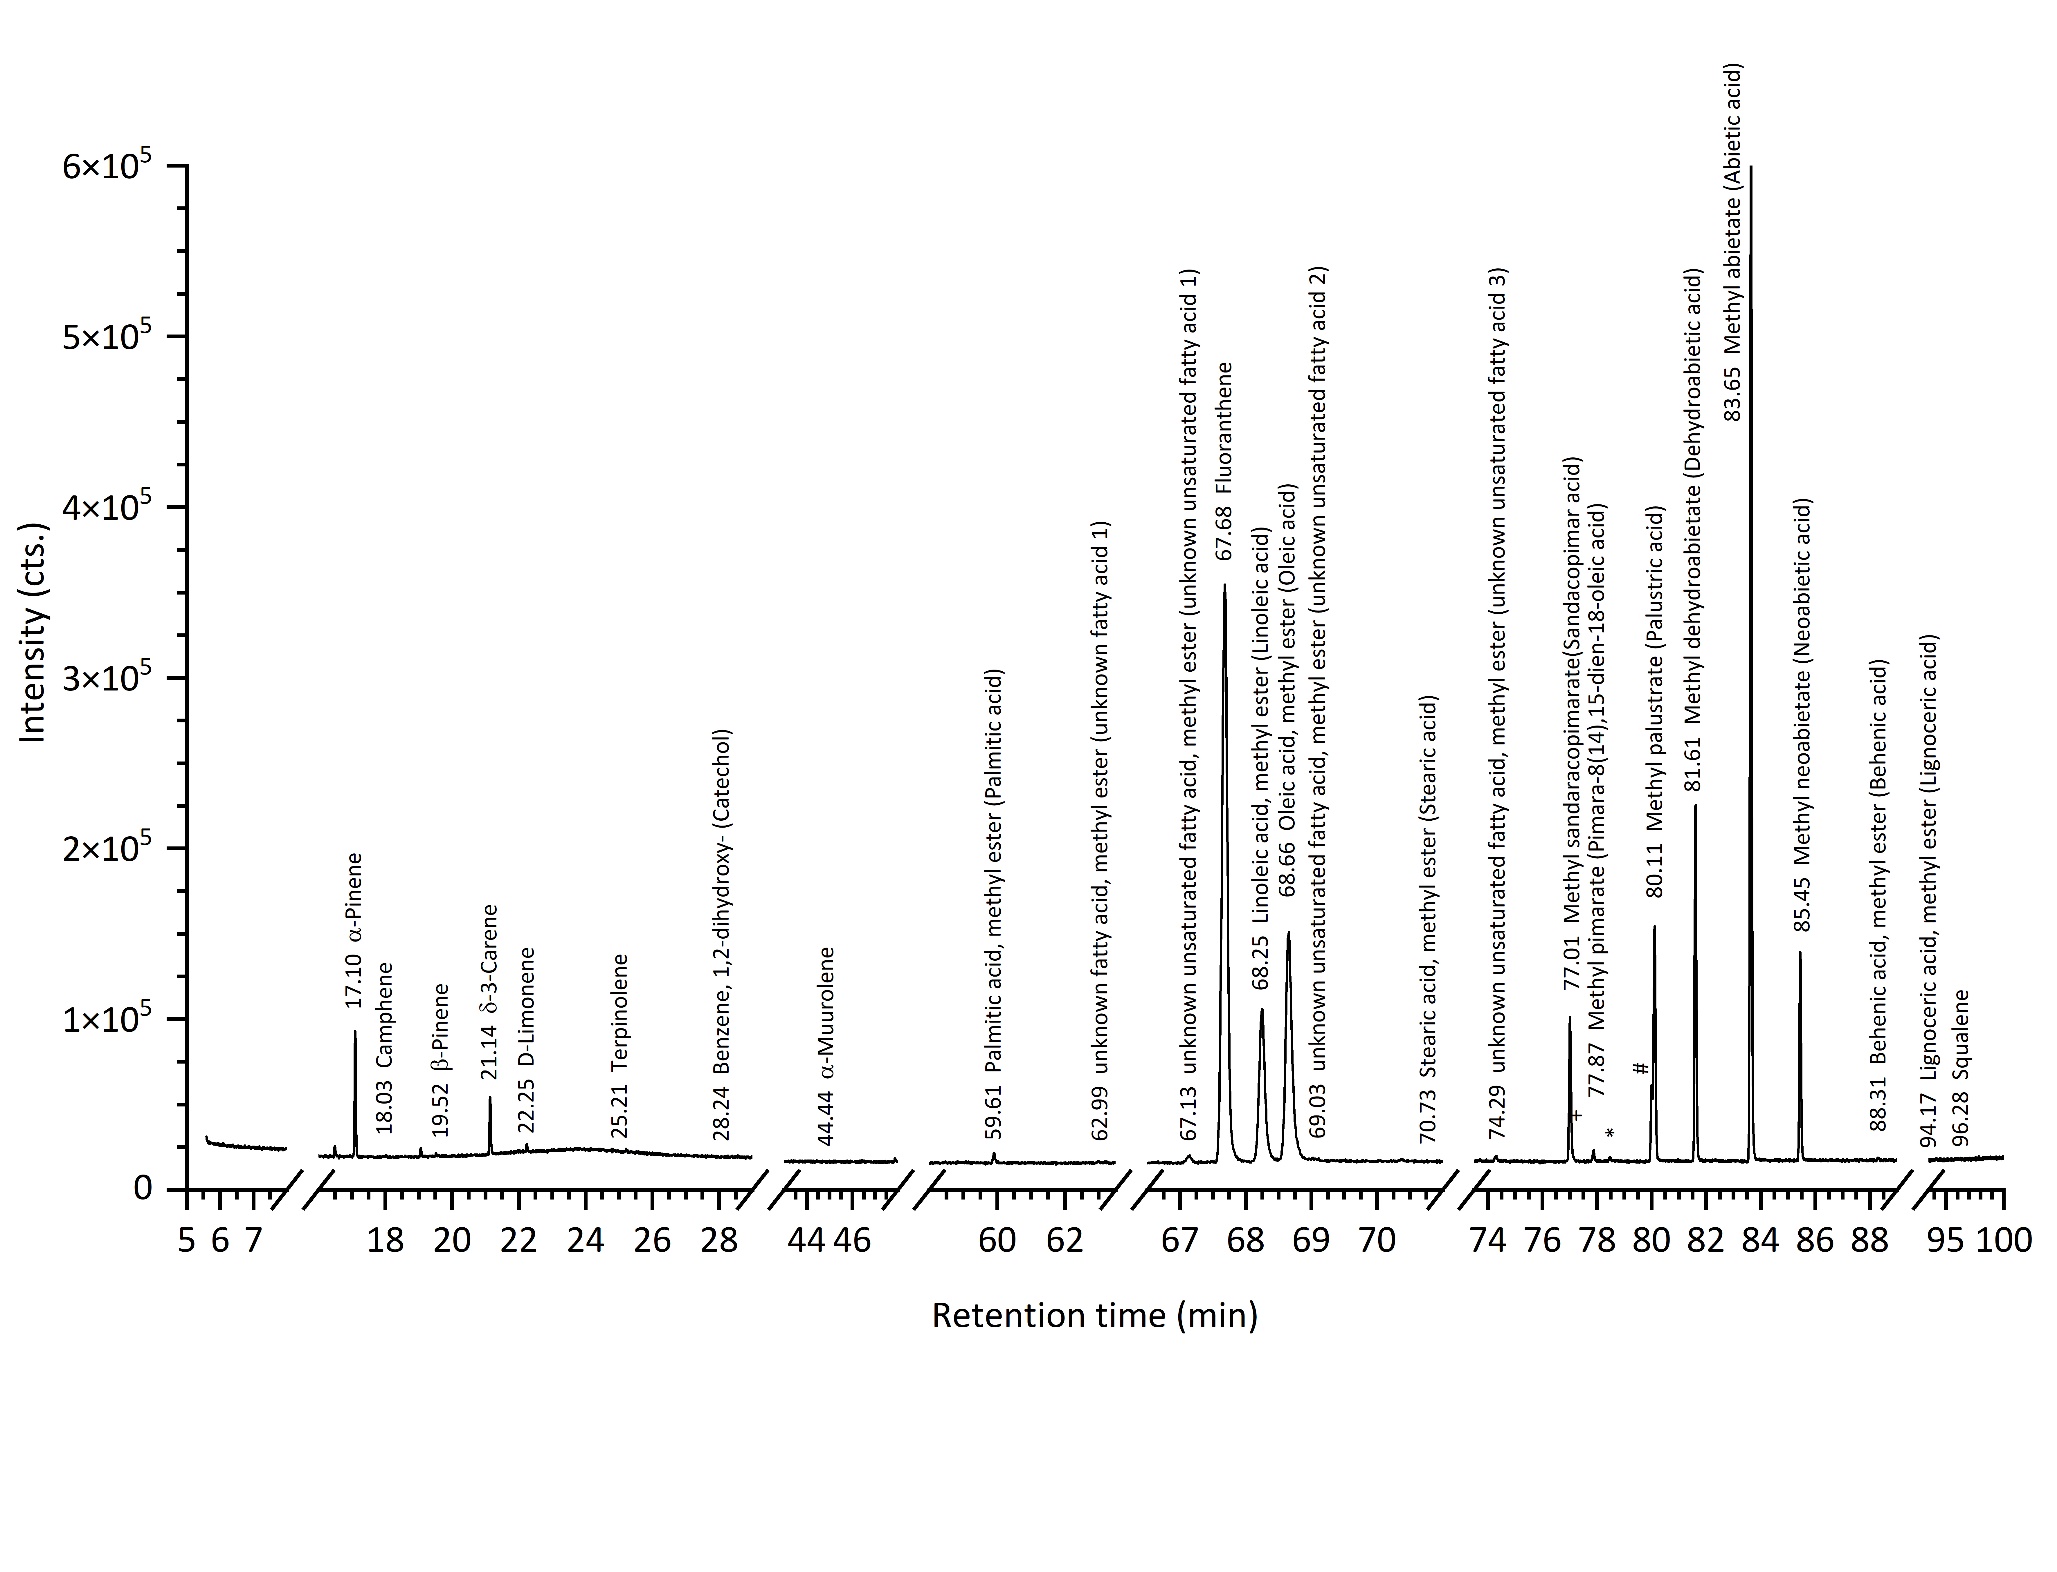


**Supplementary Figure S1:** GC-FID chromatogram of crude tall oil with MS identification and retention time (min), + 77.11 trans-3,5-Dyhydroxystilbene, * 78.47 unknown unsaturated fatty acid 4, # 80.00 Methyl-7,15-Isopimaradien-18-oate (Isopimaric acid).
